# Supplementary material
Source: PubMed Central journal article supplement (PMC7540945)
Supplement: rstb20190608supp2.pdf [file rstb20190608supp2.pdf]

## Comparing dominant and non-dominant

### Supplementary Table 2. Paired *t*-test comparing measures of physical activity when accelerometer was worn on the dominant and non-dominant wrist (Hadza participant subset)

#### Paired *t*-test: ENMO

```
data: ENMO dominant & ENMO non-dominant
t = -0.32034, df = 13, p-value = 0.7538
alternative hypothesis: true difference in means is not equal to 0
95 percent confidence interval:
 -10.089126  7.483425
sample estimates:
mean of the differences
      -1.302851
```

#### Paired *t*-test

```
data: MVPA dominant & MVPA non-dominant
t = 0.47782, df = 10, p-value = 0.6431
alternative hypothesis: true difference in means is not equal to 0
95 percent confidence interval:
 -55.31783  85.51997
sample estimates:
mean of the differences
      15.10107
```

## Comparing dominant and non-dominant

### **Supplementary Table 3.** Wilcoxon test comparing measures of physical activity when accelerometer was worn on the dominant and non-dominant wrist (Hadza participant subset)

#### **Wilcoxon signed rank test**

data: ENMO dominant & ENMO non-dominant  
V = 54, p-value = 0.9515  
alternative hypothesis: true location shift is not equal to 0

#### **Wilcoxon signed rank test**

data: MVPA dominant & MVPA non-dominant  
V = 45, p-value = 0.3203  
alternative hypothesis: true location shift is not equal to 0
