# Supplementary material
Source: PubMed Central journal article supplement (PMC7540945)
Supplement: rstb20190608supp3.pdf [file rstb20190608supp3.pdf]

## Generalized Additive Models

**Supplementary Table 4.** Generalized Additive Models testing for an interaction between age and sex on physical function measures for Hadza participants

**Formula: enmo - sex + s(age) + s(age, by = sex\_orderedFactor)**

```

Parametric coefficients:
      Estimate Std. Error t value Pr(>|t|)
(Intercept)  50.221      3.209  15.652 <2e-16 ***
sexm         -6.737      4.338  -1.553  0.127
---
Approximate significance of smooth terms:
      edf Ref.df      F p-value
s(age)      1      1  1.407  0.241
s(age):sexOFm 1      1  0.485  0.489
---
Signif. codes:  0 '***' 0.001 '**' 0.01 '*' 0.05 '.' 0.1 ' ' 1

R-sq.(adj) = 0.0921  Deviance explained = 14.4%
-REML = 211.01  Scale est. = 246.61  n = 53

```

**Formula: mvpa - sex + s(age) + s(age, by = sex\_orderedFactor)**

```

Parametric coefficients:
      Estimate Std. Error t value Pr(>|t|)
(Intercept)  225.95      19.59  11.534 4.95e-15 ***
sexm         -14.01      26.39  -0.531  0.598
---
Approximate significance of smooth terms:
      edf Ref.df      F p-value
s(age)      1      1  2.688  0.108
s(age):sexOFm 1      1  0.136  0.714
---
Signif. codes:  0 '***' 0.001 '**' 0.01 '*' 0.05 '.' 0.1 ' ' 1

R-sq.(adj) = 0.0816  Deviance explained = 13.9%
-REML = 273.64  Scale est. = 8431.9  n = 49

```

**Formula: walk test - sex + s(age) + s(age, by = sex\_orderedFactor)**

```

Parametric coefficients:
      Estimate Std. Error t value Pr(>|t|)
(Intercept)  159.838      6.700  23.855 <2e-16 ***
sexm         12.457      9.006   1.383  0.178
---
Approximate significance of smooth terms:
      edf Ref.df      F p-value
s(age)      1.762  2.23  0.517  0.558
s(age):sexOFm 1.000  1.00  0.949  0.339
---
Signif. codes:  0 '***' 0.001 '**' 0.01 '*' 0.05 '.' 0.1 ' ' 1

R-sq.(adj) = 0.0771  Deviance explained = 18.9%
-REML = 135.07  Scale est. = 590.63  n = 32

```

**Formula: grip strength - sex + s(age) + s(age, by = sex\_orderedFactor)**

```

Parametric coefficients:
      Estimate Std. Error t value Pr(>|t|)
(Intercept)  21.5026      0.8676  24.79 < 2e-16 ***
sexm         4.9141      1.1118   4.42 2.27e-05 ***
---
Approximate significance of smooth terms:
      edf Ref.df      F p-value
s(age)      5.552  6.587 11.436 5.66e-11 ***
s(age):sexOFm 2.531  3.162  3.278  0.021 *
---
Signif. codes:  0 '***' 0.001 '**' 0.01 '*' 0.05 '.' 0.1 ' ' 1

R-sq.(adj) = 0.619  Deviance explained = 64.7%
-REML = 398.54  Scale est. = 34.503  n = 124

```

## Generalized Additive Models

**Supplementary Table 5.** Generalized Additive Models testing for an interaction between age and sex on physical function measures for Pokot participants

**Formula: enmo - sex + s(age) + s(age, by = sex\_orderedFactor)**

```

Parametric coefficients:
      Estimate Std. Error t value Pr(>|t|)
(Intercept)  35.098      2.601  13.49 1.97e-15 ***
sexm         8.969       3.463   2.59 0.0139 *
---
Approximate significance of smooth terms:
      edf Ref.df      F p-value
s(age)      1      1 3.892 0.0563 .
s(age):sexOfm 1      1 0.002 0.9649
---
Signif. codes:  0 '***' 0.001 '**' 0.01 '*' 0.05 '.' 0.1 ' ' 1

R-sq.(adj) = 0.273  Deviance explained = 33%
-REML = 138.61  Scale est. = 115.03  n = 39

```

**Formula: mvpa - sex + s(age) + s(age, by = sex\_orderedFactor)**

```

Parametric coefficients:
      Estimate Std. Error t value Pr(>|t|)
(Intercept)  173.34      13.67  12.683 8.65e-13 ***
sexm         28.30       17.03   1.662 0.108
---
Approximate significance of smooth terms:
      edf Ref.df      F p-value
s(age)      1.000 1.001 10.652 0.00294 **
s(age):sexOfm 1.399 1.679 0.197 0.72316
---
Signif. codes:  0 '***' 0.001 '**' 0.01 '*' 0.05 '.' 0.1 ' ' 1

R-sq.(adj) = 0.497  Deviance explained = 55.4%
-REML = 146.89  Scale est. = 2054.5  n = 31

```

**Formula: walk test - sex + s(age) + s(age, by = sex\_orderedFactor)**

```

Parametric coefficients:
      Estimate Std. Error t value Pr(>|t|)
(Intercept)  110.808      5.314  20.851 <2e-16 ***
sexm         15.018      7.628   1.969 0.0559 .
---
Approximate significance of smooth terms:
      edf Ref.df      F p-value
s(age)      1.934 2.393 2.954 0.0738 .
s(age):sexOfm 1.000 1.000 0.032 0.8579
---
Signif. codes:  0 '***' 0.001 '**' 0.01 '*' 0.05 '.' 0.1 ' ' 1

R-sq.(adj) = 0.183  Deviance explained = 25.6%
-REML = 197.67  Scale est. = 643.9  n = 45

```

**Formula: grip strength - sex + s(age) + s(age, by = sex\_orderedFactor)**

```

Parametric coefficients:
      Estimate Std. Error t value Pr(>|t|)
(Intercept)  22.452      1.400  16.037 < 2e-16 ***
sexm         13.107      2.047   6.403 1.46e-07 ***
---
Approximate significance of smooth terms:
      edf Ref.df      F p-value
s(age)      1.001 1.001 0.298 0.588887
s(age):sexOfm 3.214 3.951 6.031 0.000636 ***
---
Signif. codes:  0 '***' 0.001 '**' 0.01 '*' 0.05 '.' 0.1 ' ' 1

R-sq.(adj) = 0.606  Deviance explained = 65.3%
-REML = 144.89  Scale est. = 45.011  n = 45

```

## Generalized Additive Models

**Supplementary Table 6.** Generalized Additive Models for the effect of sex and age on physical function measures for Hadza participants

**Formula: enmo - sex + s(age)**

```

Parametric coefficients:
      Estimate Std. Error t value Pr(>|t|)
(Intercept)  50.156      3.191  15.720 <2e-16 ***
sexm         -6.736      4.315  -1.561  0.125
---
Approximate significance of smooth terms:
      edf Ref.df      F p-value
s(age)  1      1  5.113  0.028 *
---
Signif. codes:  0 '***' 0.001 '**' 0.01 '*' 0.05 '.' 0.1 ' ' 1

R-sq.(adj) = 0.101  Deviance explained = 13.6%
-REML = 213.64  Scale est. = 244.07  n = 53

```

**Formula: mvpa - sex + s(age)**

```

Parametric coefficients:
      Estimate Std. Error t value Pr(>|t|)
(Intercept)  225.77      19.40  11.638 2.64e-15 ***
sexm         -13.99      26.14  -0.535  0.595
---
Approximate significance of smooth terms:
      edf Ref.df      F p-value
s(age)  1      1  6.869  0.0118 *
---
Signif. codes:  0 '***' 0.001 '**' 0.01 '*' 0.05 '.' 0.1 ' ' 1

R-sq.(adj) = 0.0989  Deviance explained = 13.6%
-REML = 277.89  Scale est. = 8273.5  n = 49

```

**Formula: walk test - sex + s(age)**

```

Parametric coefficients:
      Estimate Std. Error t value Pr(>|t|)
(Intercept)  158.065      6.621  23.875 <2e-16 ***
sexm         14.542      8.882  1.637  0.112
---
Approximate significance of smooth terms:
      edf Ref.df      F p-value
s(age)  1.148  1.283  1.268  0.33
---
Signif. codes:  0 '***' 0.001 '**' 0.01 '*' 0.05 '.' 0.1 ' ' 1

R-sq.(adj) = 0.0565  Deviance explained = 12.2%
-REML = 138.56  Scale est. = 603.79  n = 32

```

**Formula: grip strength - sex + s(age, by = sex)**

```

Parametric coefficients:
      Estimate Std. Error t value Pr(>|t|)
(Intercept)  21.5204      0.8743  24.613 < 2e-16 ***
sexm         4.8952      1.1134  4.397 2.51e-05 ***
---
Approximate significance of smooth terms:
      edf Ref.df      F p-value
s(age):sexf  4.649  5.572  9.287 5.68e-08 ***
s(age):sexm  5.367  6.460 19.526 < 2e-16 ***
---
Signif. codes:  0 '***' 0.001 '**' 0.01 '*' 0.05 '.' 0.1 ' ' 1

R-sq.(adj) = 0.617  Deviance explained = 65.1%
-REML = 401.61  Scale est. = 34.696  n = 124

```

## Generalized Additive Models

**Supplementary Table 7.** Generalized Additive Models for the effect of sex and age on physical function measures for Pokot participants

**Formula: enmo ~ sex + s(age)**

```

Parametric coefficients:
      Estimate Std. Error t value Pr(>|t|)
(Intercept)  35.098    2.565  13.684 7.8e-16 ***
sexm         8.968     3.415   2.626 0.0126 *
---
Approximate significance of smooth terms:
      edf Ref.df    F p-value
s(age)  1     1 10.72 0.00229 **
---
Signif. codes:  0 '***' 0.001 '**' 0.01 '*' 0.05 '.' 0.1 ' ' 1

R-sq.(adj) = 0.293  Deviance explained = 33%
-REML = 140.78  Scale est. = 111.84  n = 39

```

**Formula: mvpa ~ sex + s(age)**

```

Parametric coefficients:
      Estimate Std. Error t value Pr(>|t|)
(Intercept)  173.30    13.58  12.758 3.51e-13 ***
sexm         27.95    16.91   1.653 0.11
---
Approximate significance of smooth terms:
      edf Ref.df    F p-value
s(age) 1.024  1.047 28.52 6.69e-06 ***
---
Signif. codes:  0 '***' 0.001 '**' 0.01 '*' 0.05 '.' 0.1 ' ' 1

R-sq.(adj) = 0.504  Deviance explained = 53.7%
-REML = 150.77  Scale est. = 2029  n = 31

```

**Formula: walk test ~ sex + s(age)**

```

Parametric coefficients:
      Estimate Std. Error t value Pr(>|t|)
(Intercept)  110.759    5.246  21.111 <2e-16 ***
sexm         15.063     7.536   1.999 0.0523 .
---
Approximate significance of smooth terms:
      edf Ref.df    F p-value
s(age) 1.979  2.446 3.913 0.0279 *
---
Signif. codes:  0 '***' 0.001 '**' 0.01 '*' 0.05 '.' 0.1 ' ' 1

R-sq.(adj) = 0.203  Deviance explained = 25.7%
-REML = 200.64  Scale est. = 627.86  n = 45

```

**Formula: grip strength ~ sex + s(age, by = sex)**

```

Parametric coefficients:
      Estimate Std. Error t value Pr(>|t|)
(Intercept)  22.452     1.400  16.037 < 2e-16 ***
sexm         13.107     2.047   6.403 1.46e-07 ***
---
Approximate significance of smooth terms:
      edf Ref.df    F p-value
s(age):sexf 1.000  1.001 0.298 0.588791
s(age):sexm 3.214  3.951 5.959 0.000693 ***
---
Signif. codes:  0 '***' 0.001 '**' 0.01 '*' 0.05 '.' 0.1 ' ' 1

R-sq.(adj) = 0.606  Deviance explained = 65.3%
-REML = 144.89  Scale est. = 45.011  n = 45

```
