# Supplementary material
Source: PubMed Central journal article supplement (PMC7540945)
Supplement: rstb20190608supp4.pdf [file rstb20190608supp4.pdf]

Generalized Additive Models adjusted for body measures

**Supplementary Table 8. GAMs for Hadza ENMO, adjusted for height (cm), weight (kg) and body mass index (BMI).**

**Formula: enmo ~ s(age) + sex + htcm**

```

Parametric coefficients:
      Estimate Std. Error t value Pr(>|t|)
(Intercept) 134.3024   46.0606   2.916  0.00534 **
sexm         -0.4492    5.4381  -0.083  0.93451
htcm         -0.5639    0.3080  -1.831  0.07317 .
---
Approximate significance of smooth terms:
      edf Ref.df      F p-value
s(age)  1  1.001  5.182  0.0271 *
---
Signif. codes:  0 '***' 0.001 '**' 0.01 '*' 0.05 '.' 0.1 ' ' 1

R-sq.(adj) = 0.142  Deviance explained = 19.1%
-REML = 212.25  Scale est. = 233.1      n = 53
    
```

**Formula: enmo ~ s(age) + sex + wtkg**

```

Parametric coefficients:
      Estimate Std. Error t value Pr(>|t|)
(Intercept)  75.2015   12.9036   5.828  4.3e-07 ***
sexm         -3.9439    4.4179  -0.893  0.3764
wtkg         -0.5619    0.2810  -2.000  0.0511 .
---
Approximate significance of smooth terms:
      edf Ref.df      F p-value
s(age)  1  1.001  4.469  0.0395 *
---
Signif. codes:  0 '***' 0.001 '**' 0.01 '*' 0.05 '.' 0.1 ' ' 1

R-sq.(adj) = 0.152  Deviance explained = 20.1%
-REML = 212.03  Scale est. = 230.26      n = 53
    
```

**Formula: enmo ~ s(age) + sex + bmi**

```

Parametric coefficients:
      Estimate Std. Error t value Pr(>|t|)
(Intercept)  78.0346   18.5843   4.199  0.000113 ***
sexm         -7.7785    4.3141  -1.803  0.077534 .
bmi          -1.3993    0.9193  -1.522  0.134397
---
Approximate significance of smooth terms:
      edf Ref.df      F p-value
s(age)  1  1.001  4.017  0.0505 .
---
Signif. codes:  0 '***' 0.001 '**' 0.01 '*' 0.05 '.' 0.1 ' ' 1

R-sq.(adj) = 0.125  Deviance explained = 17.5%
-REML = 211.66  Scale est. = 237.81      n = 53
    
```

Generalized Additive Models adjusted for body measures

**Supplementary Table 9. GAMs for Hadza MVPA, adjusted for height (cm), weight (kg) and body mass index (BMI).**

**Formula: mvpa ~ sex + s(age) + htcm**

Parametric coefficients:

|             | Estimate | Std. Error | t value | Pr(> t ) |
|-------------|----------|------------|---------|----------|
| (Intercept) | 533.297  | 285.326    | 1.869   | 0.0681 . |
| sexm        | 8.984    | 33.663     | 0.267   | 0.7908   |
| htcm        | -2.059   | 1.906      | -1.080  | 0.2858   |

---

Approximate significance of smooth terms:

|        | edf | Ref.df | F     | p-value  |
|--------|-----|--------|-------|----------|
| s(age) | 1   | 1.001  | 6.509 | 0.0141 * |

---

Signif. codes: 0 '\*\*\*' 0.001 '\*\*' 0.01 '\*' 0.05 '.' 0.1 ' ' 1

R-sq.(adj) = 0.102 Deviance explained = 15.8%  
 -REML = 275.74 Scale est. = 8243.6 n = 49

**Formula: mvpa ~ sex + s(age) + wtkg**

Parametric coefficients:

|             | Estimate | Std. Error | t value | Pr(> t )   |
|-------------|----------|------------|---------|------------|
| (Intercept) | 280.122  | 80.808     | 3.467   | 0.00117 ** |
| sexm        | -7.252   | 28.031     | -0.259  | 0.79705    |
| wtkg        | -1.235   | 1.782      | -0.693  | 0.49179    |

---

Approximate significance of smooth terms:

|        | edf | Ref.df | F     | p-value  |
|--------|-----|--------|-------|----------|
| s(age) | 1   | 1      | 6.112 | 0.0172 * |

---

Signif. codes: 0 '\*\*\*' 0.001 '\*\*' 0.01 '\*' 0.05 '.' 0.1 ' ' 1

R-sq.(adj) = 0.0886 Deviance explained = 14.6%  
 -REML = 276.15 Scale est. = 8368 n = 49

**Formula: mvpa ~ sex + s(age) + bmi**

Parametric coefficients:

|             | Estimate | Std. Error | t value | Pr(> t ) |
|-------------|----------|------------|---------|----------|
| (Intercept) | 265.914  | 117.017    | 2.272   | 0.0279 * |
| sexm        | -15.089  | 26.583     | -0.568  | 0.5731   |
| bmi         | -2.045   | 5.876      | -0.348  | 0.7295   |

---

Approximate significance of smooth terms:

|        | edf | Ref.df | F     | p-value  |
|--------|-----|--------|-------|----------|
| s(age) | 1   | 1      | 6.094 | 0.0173 * |

---

Signif. codes: 0 '\*\*\*' 0.001 '\*\*' 0.01 '\*' 0.05 '.' 0.1 ' ' 1

R-sq.(adj) = 0.0813 Deviance explained = 13.9%  
 -REML = 275.14 Scale est. = 8434.7 n = 49

Generalized Additive Models adjusted for body measures

**Supplementary Table 10. GAMs for Hadza walk test, adjusted for height (cm), weight (kg) and body mass index (BMI).**

**Formula: walk test - sex + s(age) + htcm**

Parametric coefficients:

|             | Estimate | Std. Error | t value | Pr(> t ) |
|-------------|----------|------------|---------|----------|
| (Intercept) | 121.9626 | 124.9140   | 0.976   | 0.337    |
| sexm        | 11.2326  | 13.3563    | 0.841   | 0.408    |
| htcm        | 0.2423   | 0.8315     | 0.291   | 0.773    |

Approximate significance of smooth terms:

|        | edf   | Ref.df | F     | p-value |
|--------|-------|--------|-------|---------|
| s(age) | 1.316 | 1.575  | 1.011 | 0.472   |

R-sq.(adj) = 0.0326    Deviance explained = 13.6%  
 -REML = 137.8    Scale est. = 619.06    n = 32

**Formula: walk test - sex + s(age) + wtkg**

Parametric coefficients:

|             | Estimate | Std. Error | t value | Pr(> t )     |
|-------------|----------|------------|---------|--------------|
| (Intercept) | 175.1334 | 32.5356    | 5.383   | 9.75e-06 *** |
| sexm        | 17.8096  | 10.4554    | 1.703   | 0.0996 .     |
| wtkg        | -0.3998  | 0.7370     | -0.542  | 0.5918       |

---  
 Approximate significance of smooth terms:

|        | edf | Ref.df | F    | p-value |
|--------|-----|--------|------|---------|
| s(age) | 1   | 1.001  | 1.54 | 0.225   |

R-sq.(adj) = 0.0275    Deviance explained = 12.2%  
 -REML = 137.81    Scale est. = 622.37    n = 32

**Formula: walk test - sex + s(age) + bmi**

Parametric coefficients:

|             | Estimate | Std. Error | t value | Pr(> t )     |
|-------------|----------|------------|---------|--------------|
| (Intercept) | 199.016  | 42.300     | 4.705   | 6.22e-05 *** |
| sexm        | 15.224   | 8.873      | 1.716   | 0.0973 .     |
| bmi         | -2.154   | 2.186      | -0.985  | 0.3331       |

---  
 Signif. codes: 0 '\*\*\*' 0.001 '\*\*' 0.01 '\*' 0.05 '.' 0.1 ' ' 1

Approximate significance of smooth terms:

|        | edf   | Ref.df | F     | p-value |
|--------|-------|--------|-------|---------|
| s(age) | 1.002 | 1.003  | 1.711 | 0.202   |

R-sq.(adj) = 0.0502    Deviance explained = 14.2%  
 -REML = 136.38    Scale est. = 607.82    n = 32

Generalized Additive Models adjusted for body measures

**Supplementary Table 11. GAMs for Hadza grip strength, adjusted for height (cm), weight (kg) and body mass index (BMI).**

**Formula: grip strength ~ sex + s(age, by = sex) + htcm**

```

Parametric coefficients:
      Estimate Std. Error t value Pr(>|t|)
(Intercept) -48.95418    5.71006  -8.573 4.86e-14 ***
sexm         3.17403     0.92248   3.441 0.000805 ***
htcm         0.47561     0.03819  12.455 < 2e-16 ***
---
Approximate significance of smooth terms:
      edf Ref.df      F p-value
s(age):sexf 1.001  1.001 11.858 0.000791 ***
s(age):sexm 3.169  4.008  7.098 3.56e-05 ***
---
Signif. codes:  0 '***' 0.001 '**' 0.01 '*' 0.05 '.' 0.1 ' ' 1

R-sq.(adj) = 0.735  Deviance explained = 74.8%
-REML = 373.22  Scale est. = 24.011  n = 124

```

**Formula: grip strength ~ sex + s(age, by = sex) + wtkg**

```

Parametric coefficients:
      Estimate Std. Error t value Pr(>|t|)
(Intercept) -4.29248    2.38295  -1.801 0.074220 .
sexm         3.59915     0.98232   3.664 0.000374 ***
wtkg         0.60573     0.05281  11.471 < 2e-16 ***
---
Approximate significance of smooth terms:
      edf Ref.df      F p-value
s(age):sexf 1.00  1.001 9.595 0.002428 **
s(age):sexm 2.72  3.456 6.749 0.000161 ***
---
Signif. codes:  0 '***' 0.001 '**' 0.01 '*' 0.05 '.' 0.1 ' ' 1

R-sq.(adj) = 0.697  Deviance explained = 71.1%
-REML = 380.44  Scale est. = 27.485  n = 124

```

**Formula: grip strength ~ sex + s(age, by = sex) + bmi**

```

Parametric coefficients:
      Estimate Std. Error t value Pr(>|t|)
(Intercept) 13.9692    4.9649   2.814 0.00579 **
sexm         4.9382     1.1149   4.429 2.22e-05 ***
bmi          0.3989     0.2585   1.543 0.12570
---
Approximate significance of smooth terms:
      edf Ref.df      F p-value
s(age):sexf 4.454  5.371  5.99 4.00e-05 ***
s(age):sexm 5.048  6.136 11.49 1.48e-10 ***
---
Signif. codes:  0 '***' 0.001 '**' 0.01 '*' 0.05 '.' 0.1 ' ' 1

R-sq.(adj) = 0.615  Deviance explained = 65.1%
-REML = 400.95  Scale est. = 34.868  n = 124

```

Generalized Additive Models adjusted for body measures

**Supplementary Table 12. GAMs for Pokot ENMO, adjusted for height (cm), weight (kg) and body mass index (BMI).**

**Formula: enmo ~ sex + s(age) + htcm**

```

Parametric coefficients:
      Estimate Std. Error t value Pr(>|t|)
(Intercept) -13.0895   42.1887  -0.310   0.758
sexm         6.0527    4.2491   1.424   0.163
htcm         0.3021    0.2640   1.144   0.260
---
Approximate significance of smooth terms:
      edf Ref.df      F p-value
s(age)  1      1 11.29 0.00185 **
---
Signif. codes:  0 '***' 0.001 '**' 0.01 '*' 0.05 '.' 0.1 ' ' 1

R-sq.(adj) = 0.299  Deviance explained = 35.4%
-REML = 140.54  Scale est. = 110.88    n = 39

```

**Formula: enmo ~ sex + s(age) + wtkg**

```

Parametric coefficients:
      Estimate Std. Error t value Pr(>|t|)
(Intercept)  27.8362   15.5551   1.790  0.0822 .
sexm         7.9469    4.0710   1.952  0.0590 .
wtkg         0.1535    0.3242   0.473  0.6388
---
Approximate significance of smooth terms:
      edf Ref.df      F p-value
s(age)  1      1 10.17 0.00295 **
---
Signif. codes:  0 '***' 0.001 '**' 0.01 '*' 0.05 '.' 0.1 ' ' 1

R-sq.(adj) = 0.277  Deviance explained = 33.4%
-REML = 140.88  Scale est. = 114.3    n = 39

```

**Formula: enmo ~ sex + s(age) + bmi**

```

Parametric coefficients:
      Estimate Std. Error t value Pr(>|t|)
(Intercept)  43.7649   20.3168   2.154  0.0382 *
sexm         9.0876    3.4655   2.622  0.0128 *
bmi        -0.4663    1.0843  -0.430  0.6698
---
Approximate significance of smooth terms:
      edf Ref.df      F p-value
s(age)  1      1 8.171 0.00704 **
---
Signif. codes:  0 '***' 0.001 '**' 0.01 '*' 0.05 '.' 0.1 ' ' 1

R-sq.(adj) = 0.276  Deviance explained = 33.3%
-REML = 139.69  Scale est. = 114.43    n = 39

```

Generalized Additive Models adjusted for body measures

**Supplementary Table 13. GAMs for Pokot MVPA, adjusted for height (cm), weight (kg) and body mass index (BMI).**

**Formula: mvpa ~ sex + s(age) + htcm**

```

Parametric coefficients:
      Estimate Std. Error t value Pr(>|t|)
(Intercept) 287.4159   206.8727   1.389   0.176
sexm         35.8317    22.1553   1.617   0.117
htcm        -0.7189     1.2996  -0.553   0.585
---
Approximate significance of smooth terms:
      edf Ref.df    F p-value
s(age) 1.101  1.193 24.06 2.18e-05 ***
---
Signif. codes:  0 '***' 0.001 '**' 0.01 '*' 0.05 '.' 0.1 ' ' 1

R-sq.(adj) = 0.493  Deviance explained = 54.5%
-REML = 149.44  Scale est. = 2074.8    n = 31

```

**Formula: mvpa ~ sex + s(age) + wtkg**

```

Parametric coefficients:
      Estimate Std. Error t value Pr(>|t|)
(Intercept) 123.142    71.646   1.719 0.0971 .
sexm         20.140    20.252   0.994 0.3288
wtkg         1.065     1.493   0.714 0.4816
---
Approximate significance of smooth terms:
      edf Ref.df    F p-value
s(age) 1.001  1.001 27.88 9.92e-06 ***
---
Signif. codes:  0 '***' 0.001 '**' 0.01 '*' 0.05 '.' 0.1 ' ' 1

R-sq.(adj) = 0.494  Deviance explained = 54.5%
-REML = 149.2  Scale est. = 2066.9    n = 31

```

**Formula: mvpa ~ sex + s(age) + bmi**

```

Parametric coefficients:
      Estimate Std. Error t value Pr(>|t|)
(Intercept)  27.274    94.989   0.287 0.776
sexm         25.903    16.556   1.564 0.129
bmi          7.840     5.049   1.553 0.132
---
Approximate significance of smooth terms:
      edf Ref.df    F p-value
s(age)  1      1 33.41 2.08e-06 ***
---
Signif. codes:  0 '***' 0.001 '**' 0.01 '*' 0.05 '.' 0.1 ' ' 1

R-sq.(adj) = 0.527  Deviance explained = 57.4%
-REML = 147.04  Scale est. = 1933.3    n = 31

```

Generalized Additive Models adjusted for body measures

**Supplementary Table 14. GAMs for Pokot walk test, adjusted for height (cm), weight (kg) and body mass index (BMI).**

**Formula: walk test ~ sex + s(age) + htcm**

```

Parametric coefficients:
      Estimate Std. Error t value Pr(>|t|)
(Intercept) 104.2904   96.9873   1.075   0.289
sexm         14.5801   10.2666   1.420   0.163
htcm         0.0410    0.6128   0.067   0.947
---
Approximate significance of smooth terms:
      edf Ref.df    F p-value
s(age) 1.945  2.404 3.841 0.0303 *
---
Signif. codes:  0 '***' 0.001 '**' 0.01 '*' 0.05 '.' 0.1 ' ' 1

R-sq.(adj) = 0.183  Deviance explained = 25.6%
-REML = 200.21  Scale est. = 643.81    n = 45

```

**Formula: walk test ~ sex + s(age) + wtkg**

```

Parametric coefficients:
      Estimate Std. Error t value Pr(>|t|)
(Intercept) 101.6220   36.0943   2.815 0.00752 **
sexm         13.6677    9.2614   1.476 0.14782
wtkg         0.1943    0.7572   0.257 0.79883
---
Approximate significance of smooth terms:
      edf Ref.df    F p-value
s(age) 1.926  2.379 3.723 0.0359 *
---
Signif. codes:  0 '***' 0.001 '**' 0.01 '*' 0.05 '.' 0.1 ' ' 1

R-sq.(adj) = 0.183  Deviance explained = 25.6%
-REML = 199.97  Scale est. = 643.6      n = 45

```

**Formula: walk test ~ sex + s(age) + bmi**

```

Parametric coefficients:
      Estimate Std. Error t value Pr(>|t|)
(Intercept)  98.7278   45.1820   2.185 0.0348 *
sexm         15.0589    7.6218   1.976 0.0551 .
bmi          0.6374    2.3754   0.268 0.7898
---
Approximate significance of smooth terms:
      edf Ref.df    F p-value
s(age) 1.961  2.422 3.543 0.0397 *
---
Signif. codes:  0 '***' 0.001 '**' 0.01 '*' 0.05 '.' 0.1 ' ' 1

R-sq.(adj) = 0.185  Deviance explained = 25.8%
-REML = 198.82  Scale est. = 642.56    n = 45

```

Generalized Additive Models adjusted for body measures

**Supplementary Table 15. GAMs for Pokot grip strength, adjusted for height (cm), weight (kg) and body mass index (BMI).**

**Formula: grip strength ~ sex + s(age, by = sex) + htcm**

```

Parametric coefficients:
      Estimate Std. Error t value Pr(>|t|)
(Intercept) -26.2132   29.0411  -0.903  0.37245
sexm         9.6801    2.8434   3.404  0.00159 **
htcm         0.3076    0.1833   1.678  0.10170
---
Approximate significance of smooth terms:
      edf Ref.df    F p-value
s(age):sexf 1.000  1.00 0.00 0.988443
s(age):sexm 3.287  4.04 6.87 0.000249 ***
---
Signif. codes:  0 '***' 0.001 '**' 0.01 '*' 0.05 '.' 0.1 ' ' 1

R-sq.(adj) = 0.626  Deviance explained = 67.9%
-REML = 144.29  Scale est. = 42.825  n = 45

```

**Formula: grip strength ~ sex + s(age, by = sex) + wtkg**

```

Parametric coefficients:
      Estimate Std. Error t value Pr(>|t|)
(Intercept) 21.79183   10.28059   2.120  0.0407 *
sexm        13.01774    2.55843   5.088 1.02e-05 ***
wtkg         0.01396    0.21550   0.065  0.9487
---
Approximate significance of smooth terms:
      edf Ref.df    F p-value
s(age):sexf 1.001  1.002 0.294 0.591358
s(age):sexm 3.188  3.923 5.721 0.000973 ***
---
Signif. codes:  0 '***' 0.001 '**' 0.01 '*' 0.05 '.' 0.1 ' ' 1

R-sq.(adj) = 0.596  Deviance explained = 65.3%
-REML = 145.51  Scale est. = 46.195  n = 45

```

**Formula: grip strength ~ sex + s(age, by = sex) + bmi**

```

Parametric coefficients:
      Estimate Std. Error t value Pr(>|t|)
(Intercept) 37.0687   12.0632   3.073  0.00392 **
sexm        13.1457    2.0378   6.451  1.4e-07 ***
bmi         -0.7742    0.6346  -1.220  0.23005
---
Approximate significance of smooth terms:
      edf Ref.df    F p-value
s(age):sexf 1.000  1.00 0.000 0.999370
s(age):sexm 3.148  3.87 6.265 0.000673 ***
---
Signif. codes:  0 '***' 0.001 '**' 0.01 '*' 0.05 '.' 0.1 ' ' 1

R-sq.(adj) = 0.609  Deviance explained = 66.4%
-REML = 143.69  Scale est. = 44.679  n = 45

```
