# Supplementary material
Source: PubMed Central journal article supplement (PMC7540945)
Supplement: rstb20190608supp5.pdf [file rstb20190608supp5.pdf]

## Summary Statistics

**Supplementary Table 16. Summary statistics for physical function measures**

| Group | Sex    | Variable           | <i>n</i> | Age range (years) | Age mean (years) | Age SEM (years) | Variable range  | Variable mean | Variable SEM | Variable CV (%) |
|-------|--------|--------------------|----------|-------------------|------------------|-----------------|-----------------|---------------|--------------|-----------------|
| Hadza | male   | ENMO (mg)          | 29       | 16 - 67           | 42.6             | 2.6             | 17.33 - 76.40   | 43.23         | 2.85         | 35.6            |
|       |        | MVPA (min/day)     | 27       | 16 - 67           | 42.5             | 2.8             | 24.33 - 391.29  | 210.67        | 19.28        | 47.6            |
|       |        | Walk Test (m)      | 18       | 22 - 67           | 48.4             | 2.7             | 129.90 - 214.22 | 172.17        | 5.31         | 13.1            |
|       |        | Grip Strength (kg) | 75       | 4 - 77            | 36.1             | 2.2             | 4.1 - 51.4      | 26.7          | 1.2          | 37.9            |
|       | female | ENMO (mg)          | 24       | 11 - 84           | 41.3             | 3.4             | 14.32 - 83.93   | 50.39         | 3.52         | 34.2            |
|       |        | MVPA (min/day)     | 22       | 11 - 84           | 41.4             | 3.6             | 40.58 - 381.90  | 227.12        | 19.54        | 40.4            |
|       |        | Walk Test (m)      | 14       | 25 - 84           | 44.9             | 4.1             | 106.68 - 192.25 | 158.63        | 7.32         | 17.3            |
|       |        | Grip Strength (kg) | 49       | 4 - 84            | 30.7             | 2.6             | 4.1 - 38.7      | 21.5          | 1.1          | 35.5            |
| Pokot | male   | ENMO (mg)          | 22       | 15 - 74           | 36.4             | 4.1             | 20.42 - 63.33   | 44.10         | 2.32         | 24.6            |
|       |        | MVPA (min/day)     | 20       | 15 - 74           | 36.5             | 4.4             | 40.83 - 284.17  | 201.40        | 13.39        | 29.7            |
|       |        | Walk Test (m)      | 22       | 15 - 74           | 36.4             | 4.1             | 66.72 - 184.81  | 125.81        | 6.71         | 25.0            |
|       |        | Grip Strength (kg) | 22       | 15 - 74           | 36.4             | 4.1             | 20.3 - 64.6     | 36.1          | 2.2          | 28.7            |
|       | female | ENMO (mg)          | 17       | 15 - 78           | 36.6             | 4.3             | 8.87 - 59.79    | 35.06         | 3.18         | 37.4            |
|       |        | MVPA (min/day)     | 11       | 15 - 78           | 36.6             | 5.5             | 50.08 - 275.25  | 173.03        | 21.06        | 40.4            |
|       |        | Walk Test (m)      | 23       | 14 - 78           | 37.9             | 4.0             | 68.71 - 149.30  | 110.77        | 4.73         | 20.5            |
|       |        | Grip Strength (kg) | 23       | 14 - 78           | 37.9             | 4.0             | 11.3 - 31.7     | 22.4          | 1.2          | 25.0            |
