# Supplementary material
Source: PubMed Central journal article supplement (PMC7540945)
Supplement: rstb20190608supp6.pdf [file rstb20190608supp6.pdf]

## Generalized Linear Models

### Supplementary Table 17. Generalized Linear Models for ENMO values in Hadza participants

**formula = enmo ~ age + sex**

Residuals:

| Min     | 1Q      | Median | 3Q     | Max    |
|---------|---------|--------|--------|--------|
| -27.409 | -12.944 | -1.671 | 15.118 | 31.847 |

Coefficients:

|             | Estimate | Std. Error | t value | Pr(> t ) |     |
|-------------|----------|------------|---------|----------|-----|
| (Intercept) | 63.7330  | 6.7082     | 9.501   | 8.75e-13 | *** |
| age         | -0.3236  | 0.1431     | -2.262  | 0.0281   | *   |
| sexm        | -6.7362  | 4.3151     | -1.561  | 0.1248   |     |

---

Signif. codes: 0 '\*\*\*' 0.001 '\*\*' 0.01 '\*' 0.05 '.' 0.1 ' ' 1

Residual standard error: 15.62 on 50 degrees of freedom

(12 observations deleted due to missingness)

Multiple R-squared: 0.136, Adjusted R-squared: 0.1014

F-statistic: 3.935 on 2 and 50 DF, p-value: 0.02587

**formula = enmo ~ sex \* age**

Residuals:

| Min     | 1Q      | Median | 3Q     | Max    |
|---------|---------|--------|--------|--------|
| -29.870 | -11.449 | -0.999 | 14.691 | 32.330 |

Coefficients:

|             | Estimate | Std. Error | t value | Pr(> t ) |     |
|-------------|----------|------------|---------|----------|-----|
| (Intercept) | 59.9382  | 8.6664     | 6.916   | 8.95e-09 | *** |
| sexm        | 1.7068   | 12.8655    | 0.133   | 0.895    |     |
| age         | -0.2316  | 0.1952     | -1.186  | 0.241    |     |
| sexm:age    | -0.2012  | 0.2887     | -0.697  | 0.489    |     |

---

Signif. codes: 0 '\*\*\*' 0.001 '\*\*' 0.01 '\*' 0.05 '.' 0.1 ' ' 1

Residual standard error: 15.7 on 49 degrees of freedom

(12 observations deleted due to missingness)

Multiple R-squared: 0.1445, Adjusted R-squared: 0.09211

F-statistic: 2.759 on 3 and 49 DF, p-value: 0.05209

## Generalized Linear Models

### Supplementary Table 18. Generalized Linear Models for time in MVPA in Hadza participants

**formula = mvpa ~ age + sex**

```
Residuals:
  Min       1Q   Median       3Q      Max
-171.98  -76.83   10.32   60.85  181.69

Coefficients:
              Estimate Std. Error t value Pr(>|t|)
(Intercept)  318.851    40.007   7.970 3.27e-10 ***
sexm         -13.992    26.141  -0.535  0.5951
age          -2.215     0.845  -2.621  0.0118 *
---
Signif. codes:  0 '***' 0.001 '**' 0.01 '*' 0.05 '.' 0.1 ' ' 1

Residual standard error: 90.96 on 46 degrees of freedom
(16 observations deleted due to missingness)
Multiple R-squared:  0.1364, Adjusted R-squared:  0.0989
F-statistic: 3.634 on 2 and 46 DF, p-value: 0.03425
```

**formula = mvpa ~ sex \* age**

```
Residuals:
  Min       1Q   Median       3Q      Max
-169.813  -72.643   9.837   60.168  186.849

Coefficients:
              Estimate Std. Error t value Pr(>|t|)
(Intercept)  306.6112    52.2774   5.865 4.95e-07 ***
sexm         12.4830    76.4921   0.163  0.871
age          -1.9196     1.1706  -1.640  0.108
sexm:age     -0.6304     1.7095  -0.369  0.714
---
Signif. codes:  0 '***' 0.001 '**' 0.01 '*' 0.05 '.' 0.1 ' ' 1

Residual standard error: 91.83 on 45 degrees of freedom
(16 observations deleted due to missingness)
Multiple R-squared:  0.139, Adjusted R-squared:  0.08165
F-statistic: 2.423 on 3 and 45 DF, p-value: 0.07819
```

## Generalized Linear Models

**Supplementary Table 19.** Generalized Linear Models for ENMO values in Pokot participants

**formula = enmo ~ age + sex**

Residuals:

| Min     | 1Q     | Median | 3Q    | Max    |
|---------|--------|--------|-------|--------|
| -30.631 | -5.223 | -1.898 | 6.791 | 23.370 |

Coefficients:

|             | Estimate | Std. Error | t value | Pr(> t ) |     |
|-------------|----------|------------|---------|----------|-----|
| (Intercept) | 46.20714 | 4.26188    | 10.842  | 6.86e-13 | *** |
| sexm        | 8.96832  | 3.41504    | 2.626   | 0.01260  | *   |
| age         | -0.30467 | 0.09303    | -3.275  | 0.00234  | **  |

---  
Signif. codes: 0 '\*\*\*' 0.001 '\*\*' 0.01 '\*' 0.05 '.' 0.1 ' ' 1

Residual standard error: 10.58 on 36 degrees of freedom

(6 observations deleted due to missingness)

Multiple R-squared: 0.33, Adjusted R-squared: 0.2927

F-statistic: 8.864 on 2 and 36 DF, p-value: 0.0007408

**formula = enmo ~ sex \* age**

Residuals:

| Min     | 1Q     | Median | 3Q    | Max    |
|---------|--------|--------|-------|--------|
| -30.554 | -5.170 | -1.959 | 6.782 | 23.492 |

Coefficients:

|             | Estimate  | Std. Error | t value | Pr(> t ) |     |
|-------------|-----------|------------|---------|----------|-----|
| (Intercept) | 46.014244 | 6.130819   | 7.505   | 8.61e-09 | *** |
| sexm        | 9.282039  | 7.874177   | 1.179   | 0.2464   |     |
| age         | -0.299401 | 0.151733   | -1.973  | 0.0564   | .   |
| sexm:age    | -0.008595 | 0.193735   | -0.044  | 0.9649   |     |

---  
Signif. codes: 0 '\*\*\*' 0.001 '\*\*' 0.01 '\*' 0.05 '.' 0.1 ' ' 1

Residual standard error: 10.72 on 35 degrees of freedom

(6 observations deleted due to missingness)

Multiple R-squared: 0.33, Adjusted R-squared: 0.2726

F-statistic: 5.746 on 3 and 35 DF, p-value: 0.002635

## Generalized Linear Models

### Supplementary Table 20. Generalized Linear Models for grip strength in Pokot female participants

**formula = grip strength ~ age**

Residuals:

| Min     | 1Q     | Median | 3Q    | Max   |
|---------|--------|--------|-------|-------|
| -11.551 | -3.276 | 0.474  | 3.984 | 8.877 |

Coefficients:

|             | Estimate | Std. Error | t value | Pr(> t )     |
|-------------|----------|------------|---------|--------------|
| (Intercept) | 23.96065 | 2.66525    | 8.990   | 1.21e-08 *** |
| age         | -0.04064 | 0.06305    | -0.645  | 0.526        |

---

Signif. codes: 0 '\*\*\*' 0.001 '\*\*' 0.01 '\*' 0.05 '.' 0.1 ' ' 1

Residual standard error: 5.68 on 21 degrees of freedom

Multiple R-squared: 0.0194, Adjusted R-squared: -0.0273

F-statistic: 0.4154 on 1 and 21 DF, p-value: 0.5262
