# Supplementary material
Source: PubMed Central journal article supplement (PMC7540945)

## Pokot grip strength

**Supplementary Table 21.** Generalized Additive Models of Pokot grip strength, subset excluding 2 male participants with highest values

*Testing for age \* sex interaction*

**Formula: grip strength ~ sex + s(age) + s(age, by = sex\_orderedFactor)**

```
Parametric coefficients:
      Estimate Std. Error t value Pr(>|t|)
(Intercept)  22.452      1.400  16.037 < 2e-16 ***
sexm         13.107      2.047   6.403 1.46e-07 ***
---
Approximate significance of smooth terms:
      edf Ref.df    F  p-value
s(age)      1.001  1.001 0.298 0.588887
s(age):sexOfm 3.214  3.951 6.031 0.000636 ***
---
Signif. codes:  0 '***' 0.001 '**' 0.01 '*' 0.05 '.' 0.1 ' ' 1

R-sq.(adj) = 0.606  Deviance explained = 65.3%
-REML = 144.89  Scale est. = 45.011  n = 45
```

*Testing for significance of sex and age*

**Formula: grip strength ~ sex + s(age, by = sex)**

```
Parametric coefficients:
      Estimate Std. Error t value Pr(>|t|)
(Intercept)  22.452      1.400  16.037 < 2e-16 ***
sexm         13.107      2.047   6.403 1.46e-07 ***
---
Approximate significance of smooth terms:
      edf Ref.df    F  p-value
s(age):sexf 1.000  1.001 0.298 0.588791
s(age):sexm 3.214  3.951 5.959 0.000693 ***
---
Signif. codes:  0 '***' 0.001 '**' 0.01 '*' 0.05 '.' 0.1 ' ' 1

R-sq.(adj) = 0.606  Deviance explained = 65.3%
-REML = 144.89  Scale est. = 45.011  n = 45
```

## Pokot grip strength

**Supplementary Figure 1.** Pokot maximum grip strength, two Pokot male participants with highest grip strength values (open green circles) removed. Solid line represents age spline produced from model with all participants. Dashed line represents age spline produced from model with reduced sample.

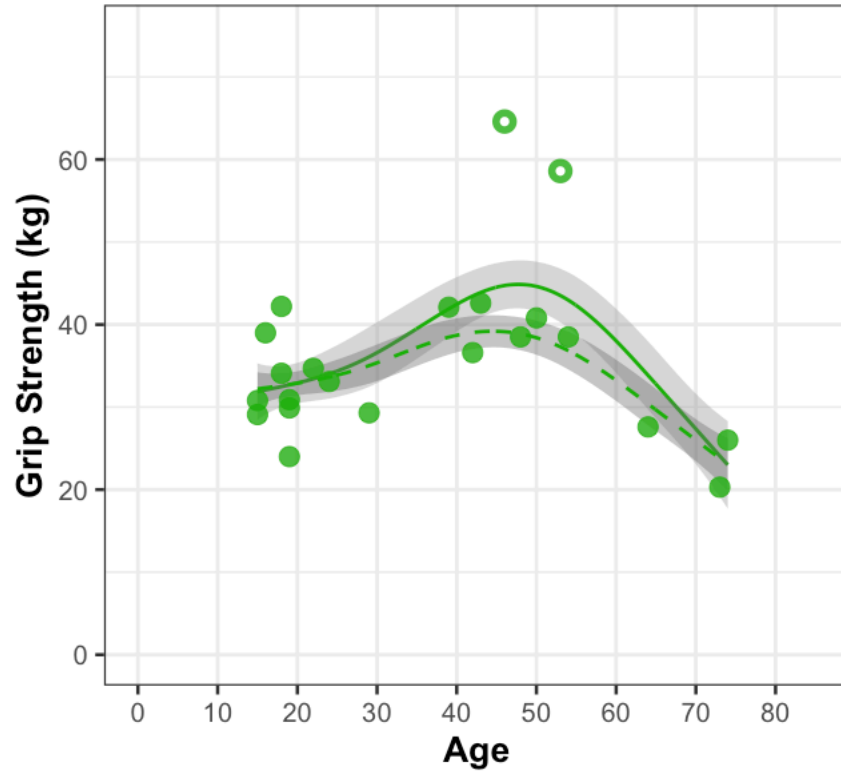

Supplement: rstb20190608supp7.pdf [file rstb20190608supp7.pdf]
